# Supplementary material
Source: Springer Nature journal article supplement (https://www.springermedizin.de/resource/supplementary/12876_2011_656_MOESM7_ESM.pdf/9437188)

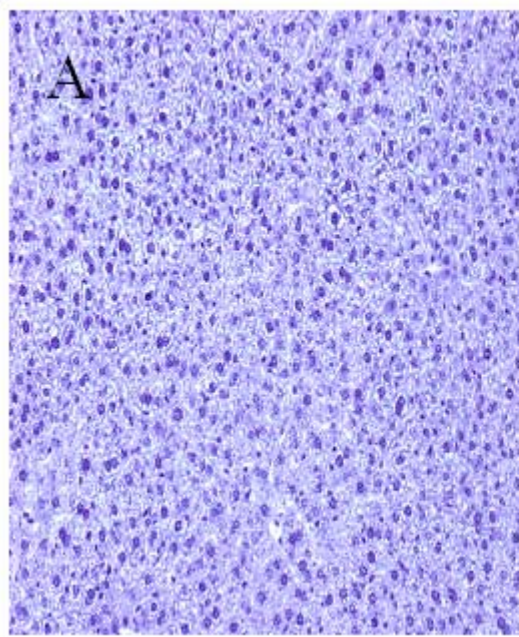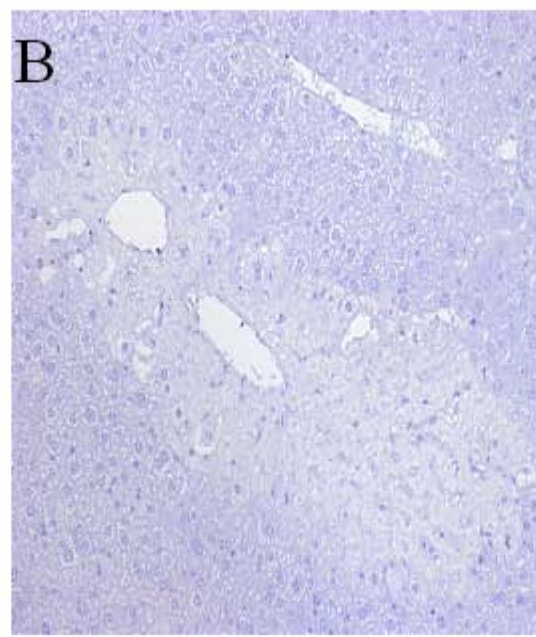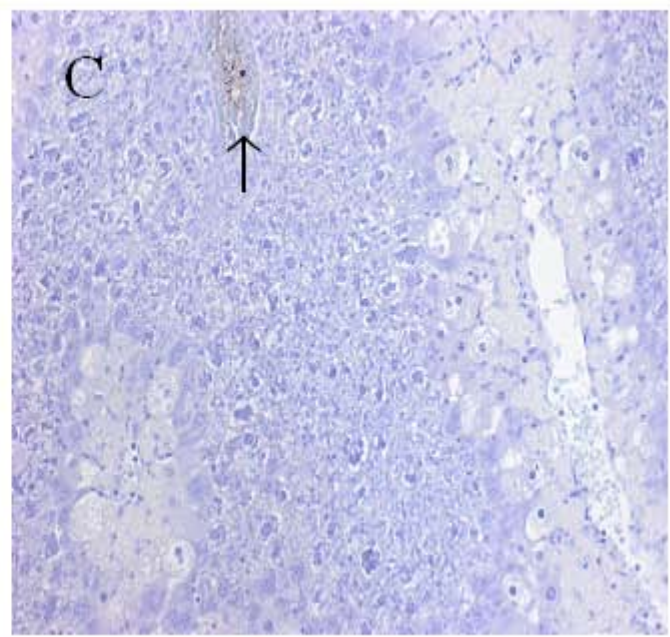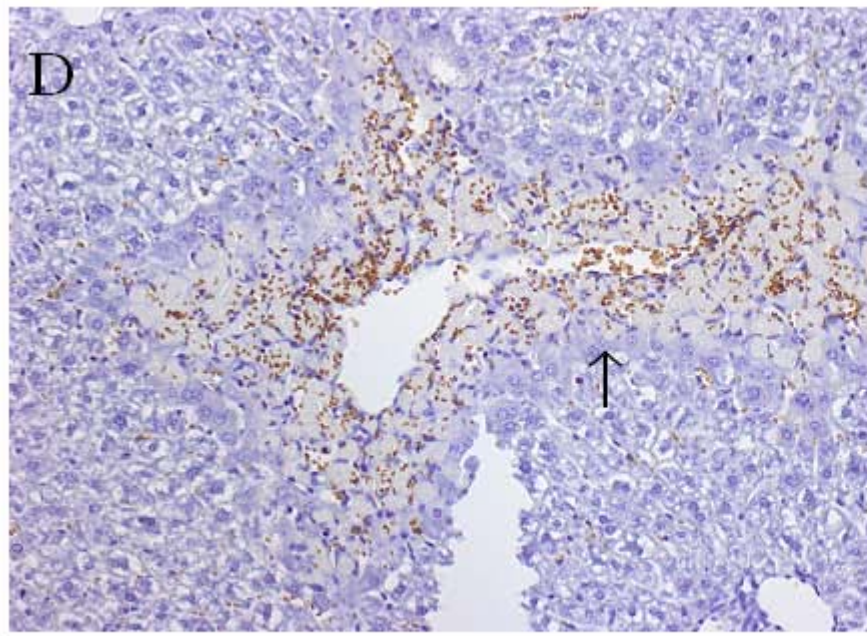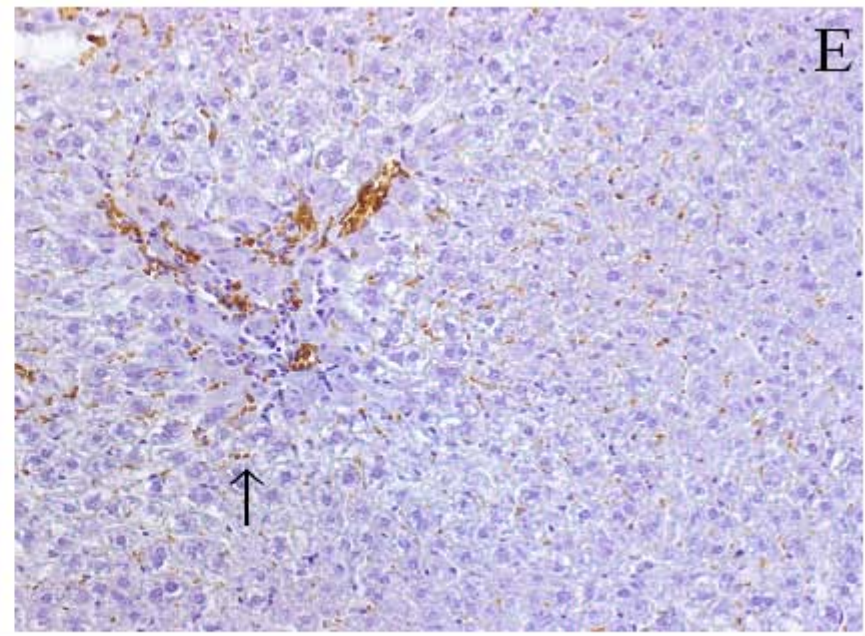

Supplement: MOESM7 [file 9437188]
